# Supplementary material
Source: PubMed Central journal article supplement (PMC5075081)
Supplement: AAC.01173-16_zac011165674so1.pdf [file AAC.01173-16_zac011165674so1.pdf]

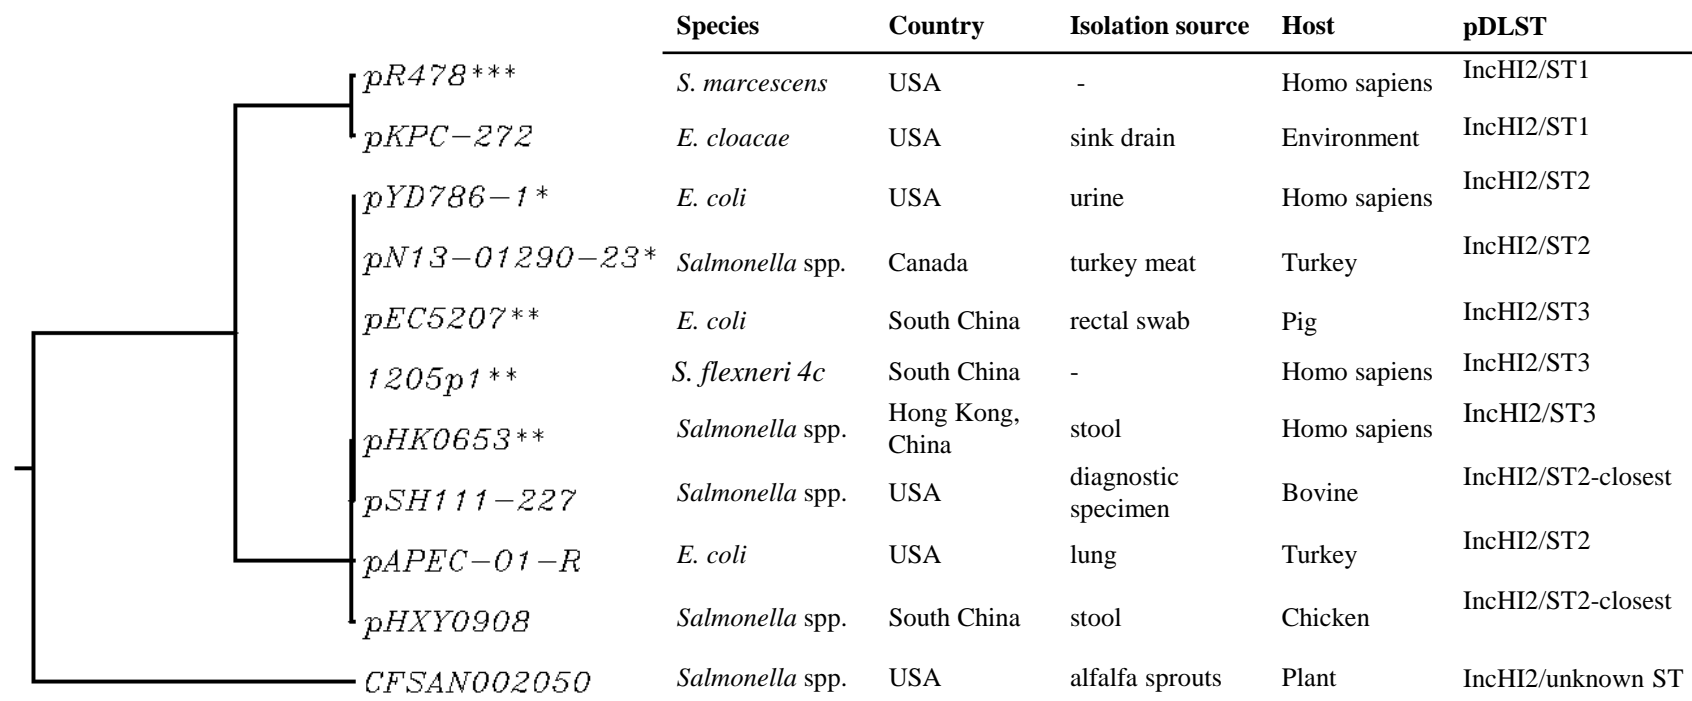

Figure S1 Phylogenetic analysis of replication regions of IncHI2 plasmids. *repHIA*, *repHI2* and its *iterons* nucleotide sequence identities are indicated on the right. Plasmids (GenBank accession no.): pYD786-1\* (KU254578.1, 100% identity with replication regions of pN13-01290\_23, CP012931.1); pHK0653\*\* (KT334335.1, 100% identity with replication regions of pEC5207, KT347600.1; 1205p1, CP012141.1); pSH111\_227 (JN983042.1); pAPEC-O1-R (DQ517526.1); pHXY0908 (KM877269.1); pR478\*\*\* (BX664015.1, 100% identity with replication regions of 13 plasmids as follows, pH11 (CP013215.1), pRH-R27 (LN555650.1), pRH-R178 (HG530658.1), p34977-263.138kb (CP012170.1), pCAV1151-296 (CP011601.1), pMRVIM0813 (KP975077.1), pKST313 (LN794248.1), pENT-08e (CP008906.1), pENT-8a4 (CP008899.1), pStm-A54650 (LK056646.1), pEC-IMPQ (EU855788.1), pEC-IMP (EU855787.1), pK29 (EF382672.1)), pKPC-272 (CP008825.1). pRH-R178 and p34977-263.138kb were ST1-like (*smr0199* absent). CFSAN002050, *Salmonella enterica* subsp. *enterica* Serovar *Cubana* str. CFSAN002050 plasmid (CP006056.1). The rooted dendrogram with branch length (UPGMA) was generated by Clustal W (<http://www.genome.jp/tools/clustalw/>).
